# Supplementary material
Source: PubMed Central journal article supplement (PMC7906036)
Supplement: NIHMS1612459-supplement-Supplementary_Tables.pdf [file NIHMS1612459-supplement-Supplementary_Tables.pdf]

**Supplementary Table 1: Molecular dynamics simulations**

| Condition            | Number of Simulations | Duration ( $\mu$ s) | Notes                                                                           |
|----------------------|-----------------------|---------------------|---------------------------------------------------------------------------------|
| Iron absent          | 6                     | 2.2 (each)          | No iron was added                                                               |
| Iron bound           | 6                     | 2.2 (each)          | A single $\text{Fe}^{2+}$ ion was placed in the proposed binding site initially |
| Iron in bulk solvent | 6                     | 2.2 (each)          | 15 $\text{Fe}^{2+}$ ions were placed randomly in solution initially             |

**Supplementary Table 2: Steady-state kinetic constants**

|                                                                     | $K_m$ ( $\mu\text{M}$ ) | $V_{\text{max}}$ ( $\Delta F \text{ s}^{-1}$ ) |
|---------------------------------------------------------------------|-------------------------|------------------------------------------------|
| <i>Liposome-FPN</i>                                                 |                         |                                                |
| $\text{FeCl}_2$                                                     | 13.6 +/- 2.93           | -0.00269 +/- 0.00025                           |
| $\text{CoCl}_2$                                                     | 33.5 +/- 9.84           | -0.00339 +/- 0.00011                           |
|                                                                     |                         |                                                |
| <i>Liposome-FPN + 1.25 mM <math>\text{CaCl}_2</math> (internal)</i> |                         |                                                |
| $\text{CoCl}_2$                                                     | 6.10 +/- 1.55           | -0.00246 +/- 0.000065                          |
|                                                                     |                         |                                                |
| <i>Liposome-FPN-Fab45D8.1</i>                                       |                         |                                                |
| $\text{CoCl}_2$                                                     | 4.68 +/- 0.537          | -0.00240 +/- 0.000075                          |
